# Supplementary material for: Surface functionalization of ZnO nanoparticles with sulfonate molecules as the electron transport layer in quantum dot light-emitting diodes
Source: Royal Society of Chemistry journal article supplement (doi:10.1039/d4tc00681j), 2024-01-01
Supplement: d4tc00681j1.pdf [file d4tc00681j1.pdf]

## Supplementary Information

### **Surface functionalization of ZnO nanoparticles with sulfonate molecules as the electron transport layer in quantum dot light-emitting diodes**

Yu-Cheng Chang,<sup>1</sup> Sheng-Hsiung Yang,<sup>2,\*</sup> and Wei-Sheng Chen<sup>3</sup>

*<sup>1</sup>Institute of Photonic System, College of Photonics, National Yang Ming Chiao Tung University, No.301, Section 2, Gaofa 3<sup>rd</sup> Road, Tainan 711010, Taiwan R.O.C.*

*<sup>2</sup>Institute of Lighting and Energy Photonics, College of Photonics, National Yang Ming Chiao Tung University, No.301, Section 2, Gaofa 3<sup>rd</sup> Road, Tainan 711010, Taiwan R.O.C.*

*<sup>3</sup>Opulence Optronics Co., Ltd., 3F, No. 1, Zhanye 1<sup>st</sup> Road, East District, Hsinchu 30091, Taiwan, ROC*

\*Correspondence: yangsh@nycu.edu.tw

**Table S1.** Carrier lifetime parameters of TR-PL decay curves of CdSe QDs with different ZnO NPs.

| Sample       | A <sub>1</sub> (%) | τ <sub>1</sub> (ns) | A <sub>2</sub> (%) | τ <sub>2</sub> (ns) | τ <sub>avg</sub> (ns) |
|--------------|--------------------|---------------------|--------------------|---------------------|-----------------------|
| QDs/ZnO      | 58.56              | 5.946               | 41.44              | 2.150               | 5.17                  |
| QDs/STS-ZnO  | 55.37              | 6.201               | 44.62              | 2.336               | 5.30                  |
| QDs/SBS-ZnO  | 45.89              | 6.793               | 54.11              | 2.864               | 5.48                  |
| QDs/SβSS-ZnO | 29.73              | 7.692               | 70.26              | 3.413               | 5.50                  |

$$\tau_{\text{avg}} = (A_1\tau_1^2 + A_2\tau_2^2) / (A_1\tau_1 + A_2\tau_2)$$

\*τ<sub>1</sub> and τ<sub>2</sub> are the lifetimes of different recombination decays.

**Table S2.** Device performance of QLEDs based on different ZnO NPs.

| ZnO type          | V <sub>on</sub> | L <sub>max</sub> (cd/m <sup>2</sup> @V) | CE <sub>max</sub> (cd/A@V) | EQE (%) |
|-------------------|-----------------|-----------------------------------------|----------------------------|---------|
| pristine          | 4.03            | 285,609@8.25                            | 24.4@6.84                  | 5.76    |
| STS-modified ZnO  | 3.56            | 446,192@8.06                            | 36.1@6.94                  | 8.49    |
| SBS-modified ZnO  | 3.47            | 434,722@7.78                            | 33.6@6.09                  | 7.93    |
| SβSS-modified ZnO | 3.47            | 458,810@9.66                            | 40.1@7.13                  | 9.44    |

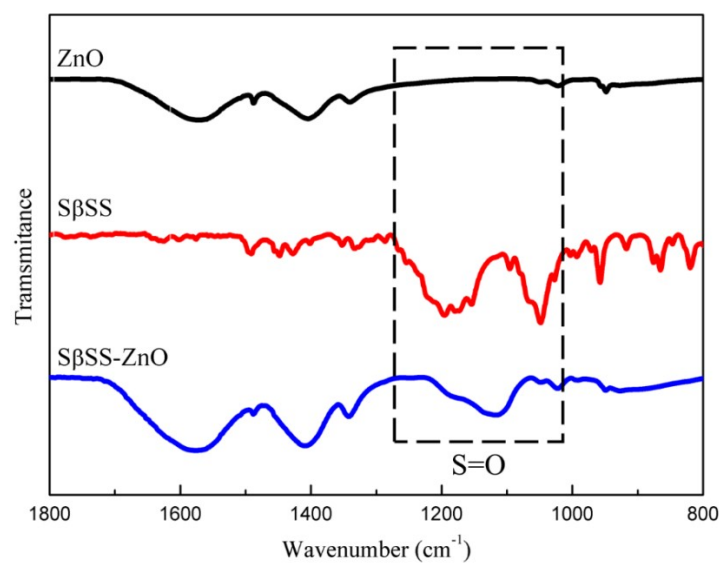

**Fig. S1** FT-IR spectra corresponding to ZnO, S $\beta$ SS, and S $\beta$ SS-modified ZnO NPs.

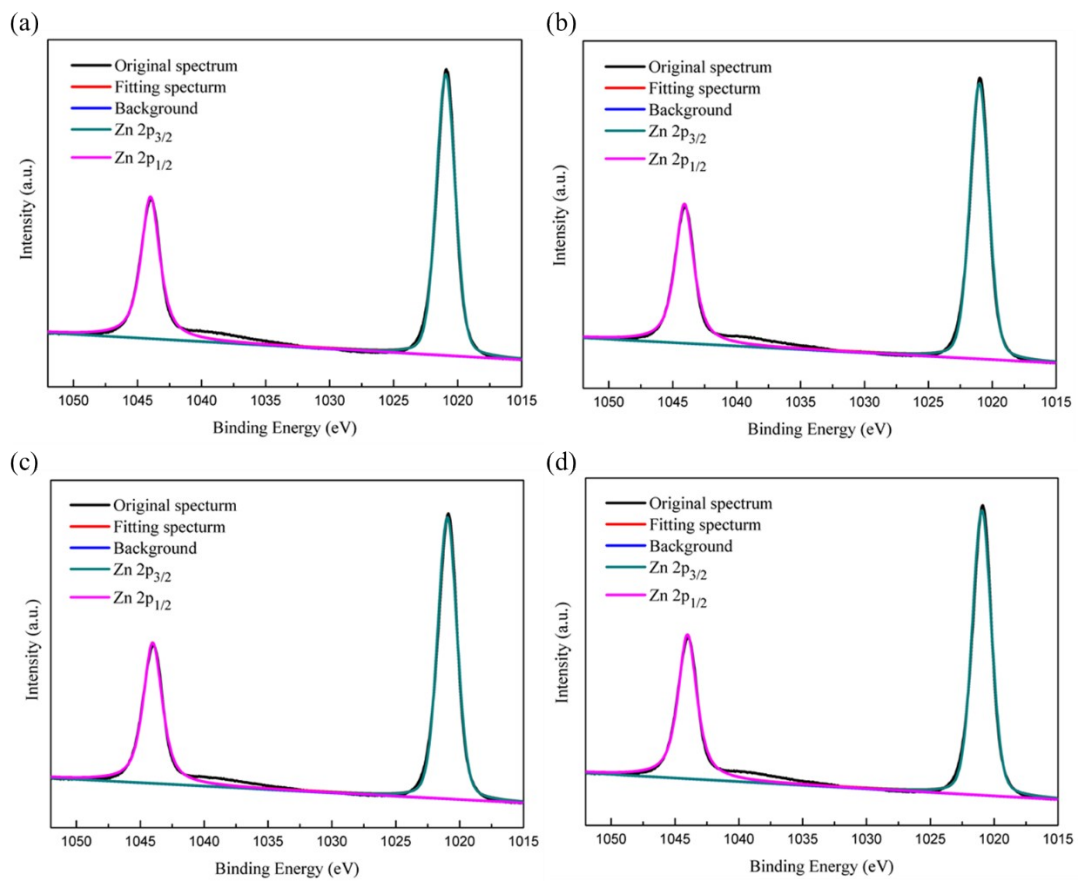

**Fig. S2** Zn 2p XPS spectra of the (a) pristine, (b) STS-, (c) SBS-, and (d) S $\beta$ SS-modified ZnO films.

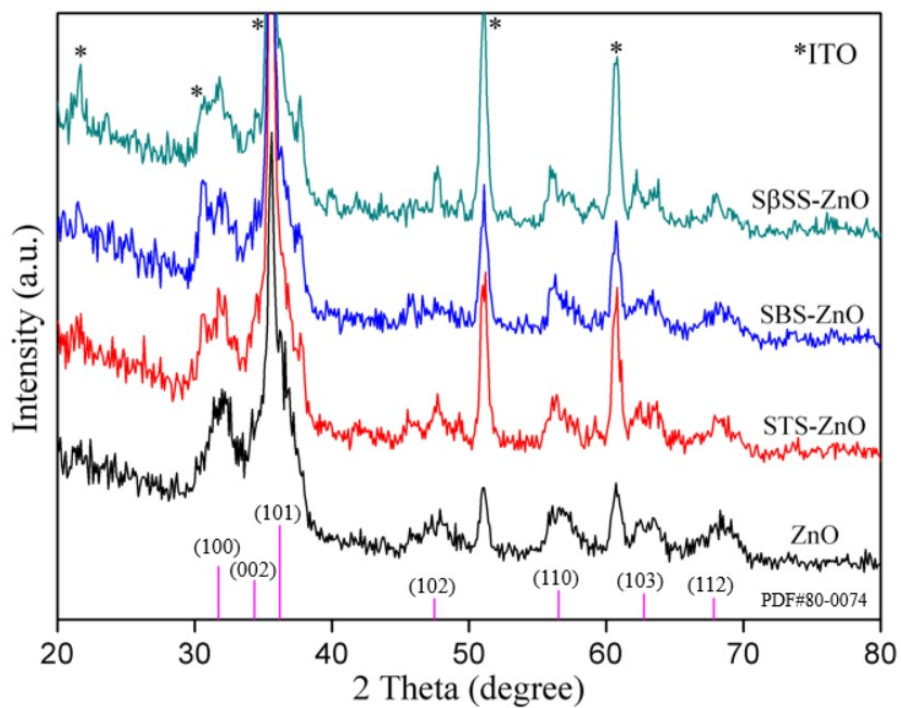

**Fig. S3** XRD patterns of the pristine and modified ZnO films.

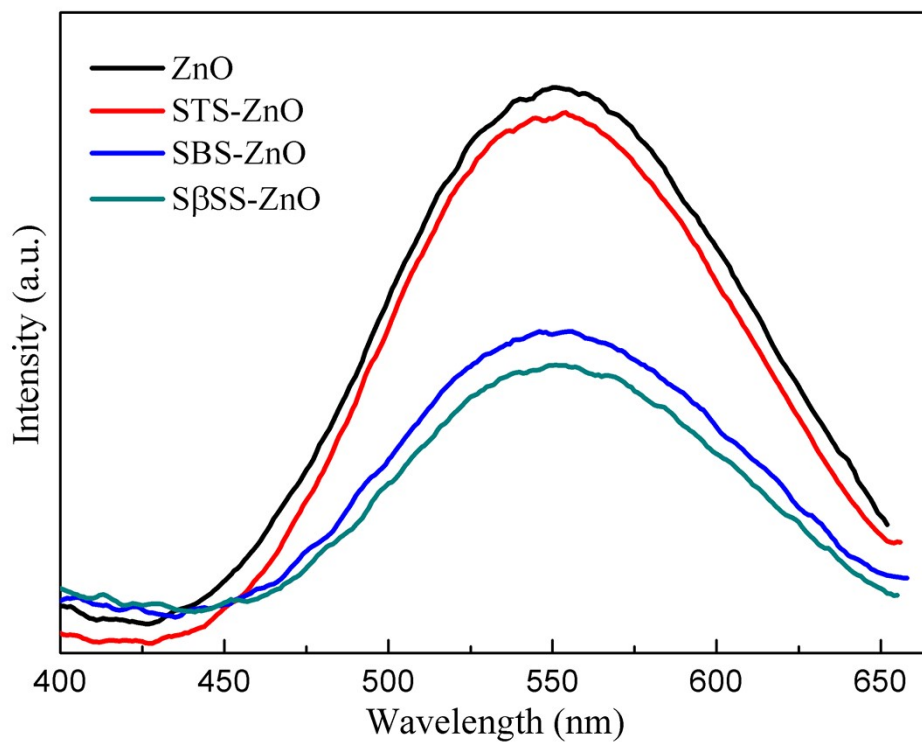

**Fig. S4** PL spectra of the pristine and modified ZnO films.

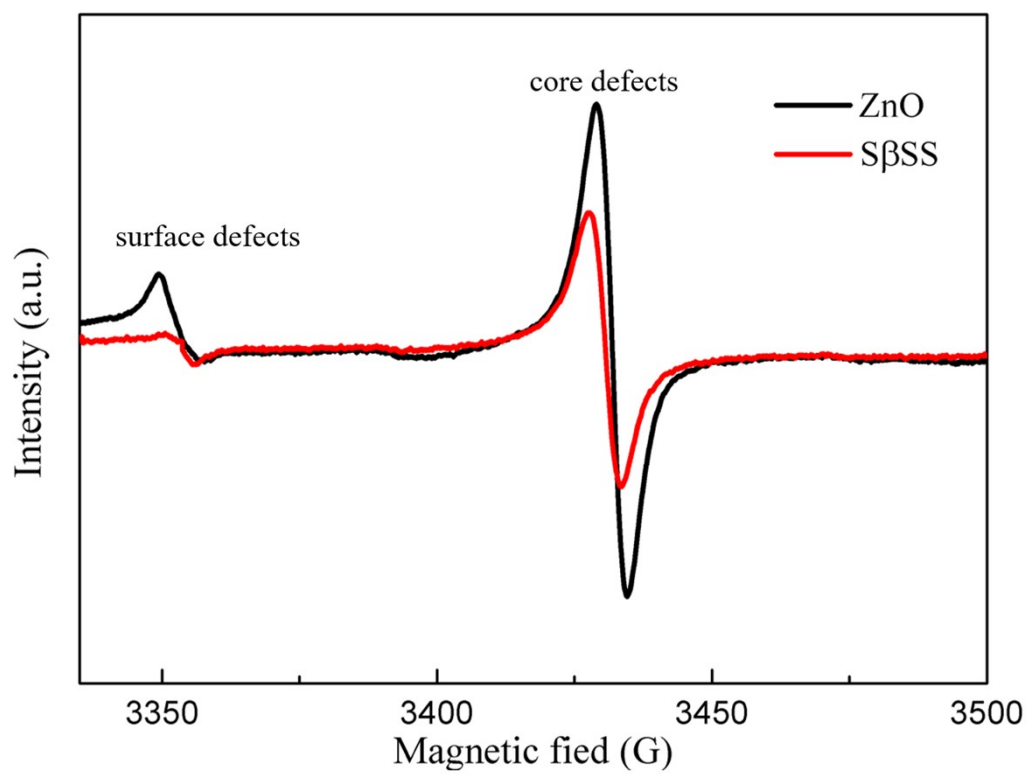

**Fig. S5** EPR spectra of the pristine and SβSS-modified ZnO NPs at room temperature.

The  $g$  value can be calculated by the following equation:  $g = h\nu/\mu_B B$ .



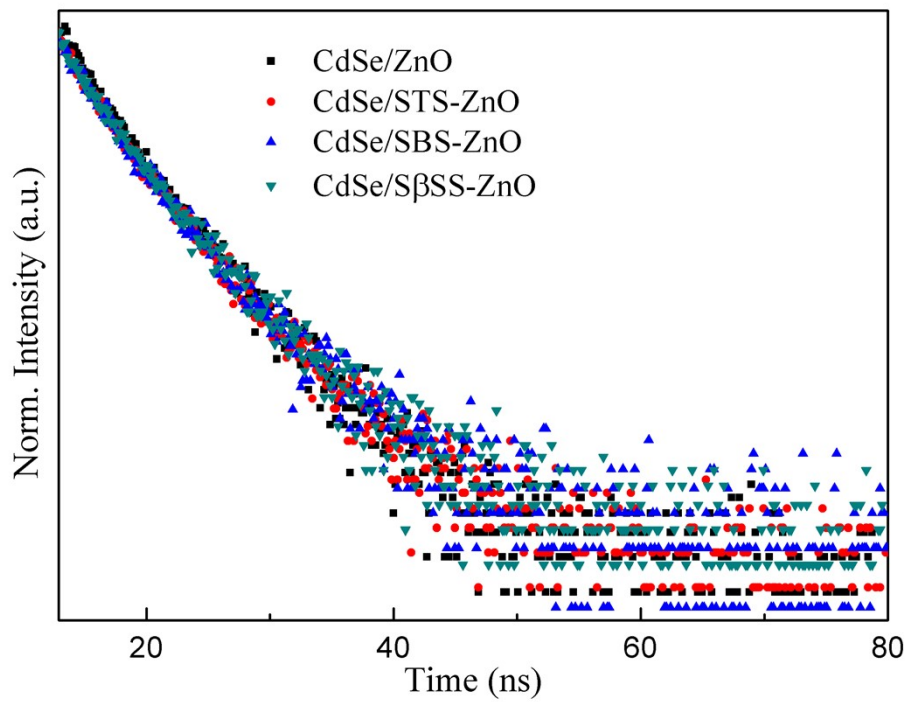

**Fig. S6** TR-PL decay curves of CdSe QDs covered with the pristine, STS-, SBS-, and SβSS-modified ZnO NPs.

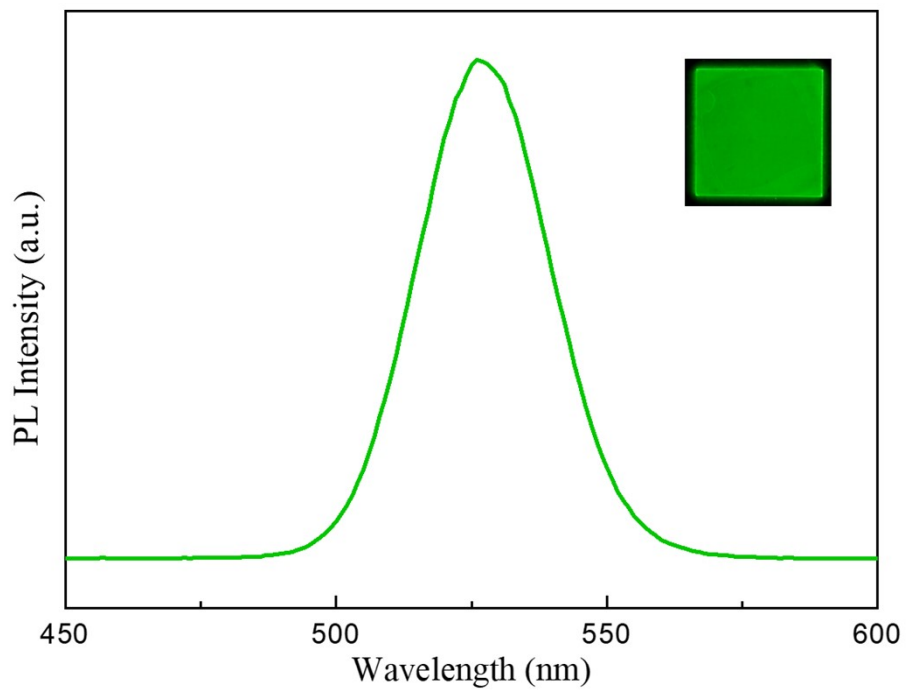

**Fig. S7** PL spectrum of the CdSe QDs. The inset shows the snapshot of the CdSe QD film under UV light exposure.

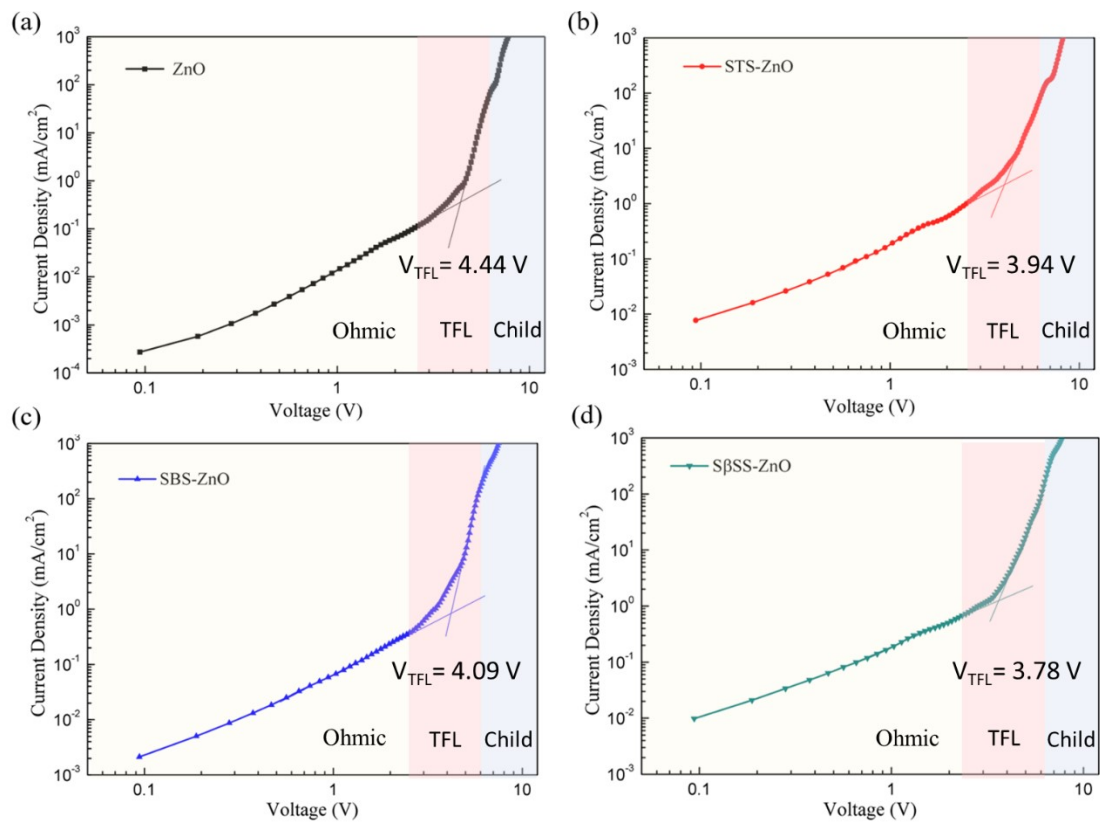

**Fig. S8** J–V characteristics of devices with the (a) pristine, (b) STS-, (c) SBS-, and (d) SβSS-modified ZnO ETLs for estimating the defect densities in QLEDs.
